# Supplementary material for: Urinary Measurement of Epigenetic DNA Modifications and 8-oxodG as Possible Noninvasive Markers of Colon Cancer Evolution
Source: MDPI journal article supplement (doi:10.3390/ijms232213826), 2022-11-10
Supplement: s1 [file s1]

| Supplementary Materials                                                                                                                              | Page No. |
|------------------------------------------------------------------------------------------------------------------------------------------------------|----------|
| Table S1. Correlation coefficients between the levels of DNA epigenetic modifications in urine - <b>control group</b> .....                          | 1        |
| Table S2. Correlation coefficients between the levels of DNA epigenetic modifications in urine - <b>inflammatory bowel disease group (IBD)</b> ..... | 2        |
| Table S3. Correlation coefficients between the levels of DNA epigenetic modifications in urine - <b>colorectal cancer patients</b> .....             | 3        |
| Table S4. Correlation coefficients between the levels of DNA epigenetic modifications in urine - <b>precancerous patients (adenoma)</b> .....        | 4        |
| Table S5. Correlation coefficients between the levels of DNA epigenetic modifications in urine for all analyzed cases .....                          | 5        |
| Table S6. Transition patterns and specific detector settings for all compounds analyzed by 2D-UPLC–MS/MS in urine .....                              | 6        |



Table S2. Correlation coefficients between the levels of DNA epigenetic modifications in urine - **inflammatory bowel disease group (IBD)**. Statistically significant correlations are indicated in red.

|         | 5-hmdU                      | 5-mdC                        | 5-hmCyt                     | 5-fCyt                       | 5-hmdC                      | 8-oxodG                     | 5-hmUra                     |
|---------|-----------------------------|------------------------------|-----------------------------|------------------------------|-----------------------------|-----------------------------|-----------------------------|
| 5-hmdU  | R=1.0000<br>N=38<br>p= ---  | R=0.2532<br>N=21<br>p=0.268  | R=0.6967<br>N=38<br>p<0.001 | R=0.2508<br>N=35<br>p=0.146  | R=0.5771<br>N=36<br>p<0.001 | R=0.5006<br>N=38<br>p=0.001 | R=0.4016<br>N=38<br>p=0.012 |
| 5-mdC   | R=0.2532<br>N=21<br>p=0.268 | R=1.0000<br>N=21<br>p= ---   | R=0.1854<br>N=21<br>p=0.421 | R=-0.0463<br>N=19<br>p=0.851 | R=0.7745<br>N=21<br>p<0.001 | R=0.1038<br>N=21<br>p=0.654 | R=0.4011<br>N=21<br>p=0.072 |
| 5-hmCyt | R=0.6967<br>N=38<br>p<0.001 | R=0.1854<br>N=21<br>p=0.421  | R=1.0000<br>N=38<br>p= ---  | R=0.3181<br>N=35<br>p=0.063  | R=0.5124<br>N=36<br>p=0.001 | R=0.4022<br>N=38<br>p=0.012 | R=0.4596<br>N=38<br>p=0.004 |
| 5-fCyt  | R=0.2508<br>N=35<br>p=0.146 | R=-0.0463<br>N=19<br>p=0.851 | R=0.3181<br>N=35<br>p=0.063 | R=1.0000<br>N=35<br>p= ---   | R=0.1442<br>N=34<br>p=0.416 | R=0.0987<br>N=35<br>p=0.573 | R=0.1337<br>N=35<br>p=0.444 |
| 5-hmdC  | R=0.5771<br>N=36<br>p<0.001 | R=0.7745<br>N=21<br>p<0.001  | R=0.5124<br>N=36<br>p=0.001 | R=0.1442<br>N=34<br>p=0.416  | R=1.0000<br>N=36<br>p= ---  | R=0.3146<br>N=36<br>p=0.062 | R=0.5621<br>N=36<br>p<0.001 |
| 8-oxodG | R=0.5006<br>N=38<br>p=0.001 | R=0.1038<br>N=21<br>p=0.654  | R=0.4022<br>N=38<br>p=0.012 | R=0.0987<br>N=35<br>p=0.573  | R=0.3146<br>N=36<br>p=0.062 | R=1.0000<br>N=38<br>p= ---  | R=0.3713<br>N=38<br>p=0.022 |
| 5-hmUra | R=0.4016<br>N=38<br>p=0.012 | R=0.4011<br>N=21<br>p=0.072  | R=0.4596<br>N=38<br>p=0.004 | R=0.1337<br>N=35<br>p=0.444  | R=0.5621<br>N=36<br>p<0.001 | R=0.3713<br>N=38<br>p=0.022 | R=1.0000<br>N=38<br>p= ---  |

Table S3. Correlation coefficients between the levels of DNA epigenetic modifications in urine - **colorectal cancer patients**. Statistically significant correlations are indicated in red.

|         | 5-hmdU                       | 5-mdC                        | 5-hmCyt                      | 5-fCyt                       | 5-hmdC                       | 8-oxodG                      | 5-hmUra                      |
|---------|------------------------------|------------------------------|------------------------------|------------------------------|------------------------------|------------------------------|------------------------------|
| 5-hmdU  | R=1.0000<br>N=123<br>p= ---  | R=0.3306<br>N=71<br>p=0.005  | R=0.6651<br>N=119<br>p<0.001 | R=0.1920<br>N=111<br>p=0.043 | R=0.4375<br>N=114<br>p<0.001 | R=0.1005<br>N=119<br>p=0.277 | R=0.4055<br>N=118<br>p<0.001 |
| 5-mdC   | R=0.3306<br>N=71<br>p=0.005  | R=1.0000<br>N=72<br>p= ---   | R=0.2763<br>N=68<br>p=0.023  | R=0.1098<br>N=67<br>p=0.376  | R=0.7105<br>N=68<br>p<0.001  | R=-0.0005<br>N=68<br>p=0.996 | R=0.3167<br>N=71<br>p=0.007  |
| 5-hmCyt | R=0.6651<br>N=119<br>p<0.001 | R=0.2763<br>N=68<br>p=0.023  | R=1.0000<br>N=119<br>p= ---  | R=0.3846<br>N=107<br>p<0.001 | R=0.3674<br>N=113<br>p<0.001 | R=0.3657<br>N=118<br>p<0.001 | R=0.4715<br>N=115<br>p<0.001 |
| 5-fCyt  | R=0.1920<br>N=111<br>p=0.043 | R=0.1098<br>N=67<br>p=0.376  | R=0.3846<br>N=107<br>p=0.001 | R=1.0000<br>N=112<br>p= ---  | R=0.0195<br>N=102<br>p=0.845 | R=0.2264<br>N=107<br>p=0.019 | R=0.1676<br>N=108<br>p=0.083 |
| 5-hmdC  | R=0.4375<br>N=114<br>p<0.001 | R=0.7105<br>N=68<br>p<0.001  | R=0.3674<br>N=113<br>p<0.001 | R=0.0195<br>N=102<br>p=0.845 | R=1.0000<br>N=114<br>p= ---  | R=0.1042<br>N=113<br>p=0.272 | R=0.3511<br>N=110<br>p<0.001 |
| 8-oxodG | R=0.1005<br>N=119<br>p=0.277 | R=-0.0005<br>N=68<br>p=0.996 | R=0.3657<br>N=118<br>p<0.001 | R=0.2264<br>N=107<br>p=0.019 | R=0.1042<br>N=113<br>p=0.272 | R=1.0000<br>N=119<br>p= ---  | R=0.2026<br>N=115<br>p=0.030 |
| 5-hmUra | R=0.4055<br>N=118<br>p<0.001 | R=0.3167<br>N=71<br>p=0.007  | R=0.4715<br>N=115<br>p<0.001 | R=0.1676<br>N=108<br>p=0.083 | R=0.3511<br>N=110<br>p<0.001 | R=0.2026<br>N=115<br>p=0.030 | R=1.0000<br>N=122<br>p= ---  |

10

11

12

13

Table S4. Correlation coefficients between the levels of DNA epigenetic modifications in urine - **precancerous patients (adenoma)**. Statistically significant correlations are indicated in red.

|         | 5-hmdU                                           | 5-mdC                                               | 5-hmCyt                                             | 5-fCyt                                           | 5-hmdC                                              | 8-oxodG                                          | 5-hmUra                                          |
|---------|--------------------------------------------------|-----------------------------------------------------|-----------------------------------------------------|--------------------------------------------------|-----------------------------------------------------|--------------------------------------------------|--------------------------------------------------|
| 5-hmdU  | R=1.0000<br>N=44<br>p= ---                       | R=0.3000<br>N=31<br>p=0.101                         | <b>R=0.6702</b><br><b>N=44</b><br><b>p&lt;0.001</b> | R=0.2160<br>N=41<br>p=0.175                      | <b>R=0.4703</b><br><b>N=41</b><br><b>p=0.002</b>    | R=0.2699<br>N=44<br>p=0.076                      | <b>R=0.3790</b><br><b>N=44</b><br><b>p=0.011</b> |
| 5-mdC   | R=0.3000<br>N=31<br>p=0.101                      | R=1.0000<br>N=31<br>p= ---                          | R=0.0368<br>N=31<br>p=0.844                         | R=0.1185<br>N=29<br>p=0.540                      | <b>R=0.8273</b><br><b>N=31</b><br><b>p&lt;0.001</b> | R=0.1121<br>N=31<br>p=0.548                      | <b>R=0.3614</b><br><b>N=31</b><br><b>p=0.046</b> |
| 5-hmCyt | R=0.6702<br>N=44<br>p<0.001                      | R=0.0368<br>N=31<br>p=0.844                         | R=1.0000<br>N=44<br>p= ---                          | <b>R=0.3514</b><br><b>N=41</b><br><b>p=0.024</b> | <b>R=0.4026</b><br><b>N=41</b><br><b>p=0.009</b>    | <b>R=0.4082</b><br><b>N=44</b><br><b>p=0.006</b> | <b>R=0.4632</b><br><b>N=44</b><br><b>p=0.002</b> |
| 5-fCyt  | R=0.2160<br>N=41<br>p=0.175                      | R=0.1185<br>N=29<br>p=0.540                         | <b>R=0.3514</b><br><b>N=41</b><br><b>p=0.024</b>    | R=1.0000<br>N=41<br>p= ---                       | R=0.1747<br>N=38<br>p=0.294                         | R=0.2329<br>N=41<br>p=0.143                      | <b>R=0.3513</b><br><b>N=41</b><br><b>p=0.024</b> |
| 5-hmdC  | <b>R=0.4703</b><br><b>N=41</b><br><b>p=0.002</b> | <b>R=0.8273</b><br><b>N=31</b><br><b>p&lt;0.001</b> | <b>R=0.4026</b><br><b>N=41</b><br><b>p=0.009</b>    | R=0.1747<br>N=38<br>p=0.294                      | R=1.0000<br>N=41<br>p= ---                          | R=0.2986<br>N=41<br>p=0.058                      | <b>R=0.3595</b><br><b>N=41</b><br><b>p=0.021</b> |
| 8-oxodG | R=0.2699<br>N=44<br>p=0.076                      | R=0.1121<br>N=31<br>p=0.548                         | <b>R=0.4082</b><br><b>N=44</b><br><b>p=0.006</b>    | R=0.2329<br>N=41<br>p=0.143                      | R=0.2986<br>N=41<br>p=0.058                         | R=1.0000<br>N=44<br>p= ---                       | <b>R=0.3835</b><br><b>N=44</b><br><b>p=0.010</b> |
| 5-hmUra | <b>R=0.3790</b><br><b>N=44</b><br><b>p=0.011</b> | <b>R=0.3614</b><br><b>N=31</b><br><b>p=0.046</b>    | <b>R=0.4632</b><br><b>N=44</b><br><b>p=0.002</b>    | <b>R=0.3513</b><br><b>N=41</b><br><b>p=0.024</b> | <b>R=0.3595</b><br><b>N=41</b><br><b>p=0.021</b>    | <b>R=0.3835</b><br><b>N=44</b><br><b>p=0.010</b> | R=1.0000<br>N=44<br>p= ---                       |

14

15

16

17

Table S5. Correlation coefficients between the levels of DNA epigenetic modifications in urine for all analyzed cases. Statistically significant correlations are indicated in red.

|         | 5-hmdU                       | 5-mdC                         | 5-hmCyt                      | 5-fCyt                       | 5-hmdC                       | 8-oxodG                      | 5-hmUra                      |
|---------|------------------------------|-------------------------------|------------------------------|------------------------------|------------------------------|------------------------------|------------------------------|
| 5-hmdU  | R=1.0000<br>N=248<br>p= ---  | R =0.2568<br>N=156<br>p=0.001 | R=0.6616<br>N=243<br>p<0.001 | R=0.2044<br>N=230<br>p=0.002 | R=0.4254<br>N=234<br>p<0.001 | R=0.2232<br>N=244<br>p<0.001 | R=0.3612<br>N=243<br>p<0.001 |
| 5-mdC   | R=0.2568<br>N=156<br>p=0.001 | R =1.0000<br>N=157<br>p= ---  | R=0.1502<br>N=152<br>p=0.065 | R=0.0191<br>N=148<br>p=0.818 | R=0.7331<br>N=153<br>p<0.001 | R=0.0596<br>N=153<br>p=0.464 | R=0.2881<br>N=156<br>p<0.001 |
| 5-hmCyt | R=0.6616<br>N=243<br>p<0.001 | R=0.1502<br>N=152<br>p=0.065  | R=1.0000<br>N=243<br>p= ---  | R=0.3299<br>N=225<br>p<0.001 | R=0.3713<br>N=232<br>p<0.001 | R=0.3834<br>N=242<br>p<0.001 | R=0.4180<br>N=239<br>p<0.001 |
| 5-fCyt  | R=0.2044<br>N=230<br>p=0.002 | R=0.0191<br>N=148<br>p=0.818  | R=0.3299<br>N=225<br>p<0.001 | R=1.0000<br>N=231<br>p= ---  | R=0.0517<br>N=217<br>p=0.449 | R=0.1871<br>N=226<br>p=0.005 | R=0.1925<br>N=227<br>p=0.004 |
| 5-hmdC  | R=0.4254<br>N=234<br>p<0.001 | R=0.7331<br>N=153<br>p<0.001  | R=0.3713<br>N=232<br>p<0.001 | R=0.0517<br>N=217<br>p=0.449 | R=1.0000<br>N=234<br>p= ---  | R=0.1605<br>N=233<br>p=0.014 | R=0.3280<br>N=230<br>p<0.001 |
| 8-oxodG | R=0.2232<br>N=244<br>p<0.001 | R=0.0596<br>N=153<br>p=0.464  | R=0.3834<br>N=242<br>p<0.001 | R=0.1871<br>N=226<br>p=0.005 | R=0.1605<br>N=233<br>p=0.014 | R=1.0000<br>N=244<br>p= ---  | R=0.2748<br>N=240<br>p<0.001 |
| 5-hmUra | R=0.3612<br>N=243<br>p<0.001 | R=0.2881<br>N=156<br>p<0.001  | R=0.4180<br>N=239<br>p<0.001 | R=0.1925<br>N=227<br>p=0.004 | R=0.3280<br>N=230<br>p<0.001 | R=0.2748<br>N=240<br>p<0.001 | R=1.0000<br>N=247<br>p= ---  |

18

19

20

Table S6. Transition patterns and specific detector settings for all compounds analyzed by 2D UPLC–MS/MS in urine.

21

| compound name                                                                              |            | ionization<br>mode | nominal molecular<br>mass (Da) | pseudo-molecular<br>ion formulation | nominal parent<br>ion (Da) | nominal<br>daughter ion | capillary<br>(kV) | cone<br>(V) | collision<br>(eV) |
|--------------------------------------------------------------------------------------------|------------|--------------------|--------------------------------|-------------------------------------|----------------------------|-------------------------|-------------------|-------------|-------------------|
| 5-hydroxymethylcytosine                                                                    | quantifier | UniSpray+          | 141                            | [M+H] <sup>+</sup>                  | 142                        | 81                      | 1.3               | 40          | 18                |
|                                                                                            | qualifier  | UniSpray+          | 141                            | [M+H] <sup>+</sup>                  | 142                        | 124                     | 1.3               | 40          | 12                |
| [D <sub>3</sub> ]-5-hydroxymethylcytosine                                                  | quantifier | UniSpray+          | 144                            | [(M+3)+H] <sup>+</sup>              | 145                        | 84                      | 1.3               | 40          | 18                |
|                                                                                            | qualifier  | UniSpray+          | 144                            | [(M+3)+H] <sup>+</sup>              | 145                        | 127                     | 1.3               | 40          | 12                |
| 5-hydroxymethyl-2'-deoxycytidine                                                           | quantifier | UniSpray+          | 257                            | [M+H] <sup>+</sup>                  | 258                        | 124                     | 1.3               | 35          | 22                |
|                                                                                            | qualifier  | UniSpray+          | 257                            | [M+H] <sup>+</sup>                  | 258                        | 142                     | 1.3               | 35          | 10                |
| [D <sub>3</sub> ]-5-hydroxymethyl-2'-deoxycytidine                                         | quantifier | UniSpray+          | 260                            | [(M+3)+H] <sup>+</sup>              | 261                        | 127                     | 1.3               | 35          | 22                |
|                                                                                            | qualifier  | UniSpray+          | 260                            | [(M+3)+H] <sup>+</sup>              | 261                        | 145                     | 1.3               | 35          | 10                |
| 5-carboxylcytosine                                                                         | quantifier | UniSpray-          | 155                            | [M-H] <sup>-</sup>                  | 154                        | 67                      | 1.3               | 60          | 12                |
|                                                                                            | qualifier  | UniSpray-          | 155                            | [M-H] <sup>-</sup>                  | 154                        | 110                     | 1.3               | 60          | 12                |
| [ <sup>13</sup> C <sub>10</sub> , <sup>15</sup> N <sub>2</sub> ]-5-carboxylcytosine        | quantifier | UniSpray-          | 162                            | [(M+7)-H] <sup>-</sup>              | 161                        | 71                      | 1.3               | 60          | 12                |
|                                                                                            | qualifier  | UniSpray-          | 162                            | [(M+7)-H] <sup>-</sup>              | 161                        | 116                     | 1.3               | 60          | 12                |
| 8-oxo-2'-deoxyguanosine                                                                    | quantifier | UniSpray+          | 283                            | [M+H] <sup>+</sup>                  | 284                        | 168                     | 1.3               | 30          | 18                |
|                                                                                            | qualifier  | UniSpray+          | 283                            | [M+H] <sup>+</sup>                  | 284                        | 140                     | 1.3               | 30          | 18                |
| [ <sup>15</sup> N <sub>5</sub> ]-8-oxo-2'-deoxyguanosine                                   | quantifier | UniSpray+          | 288                            | (M+5)+H <sup>+</sup>                | 289                        | 173                     | 1.3               | 20          | 15                |
|                                                                                            | qualifier  | UniSpray+          | 288                            | (M+5)+H <sup>+</sup>                | 289                        | 145                     | 1.3               | 20          | 15                |
| 5-formylcytosine                                                                           | quantifier | UniSpray+          | 139                            | [M-H] <sup>-</sup>                  | 140                        | 97                      | 1.3               | 40          | 15                |
|                                                                                            | qualifier  | UniSpray+          | 139                            | [M-H] <sup>-</sup>                  | 140                        | 70                      | 1.3               | 40          | 15                |
| [ <sup>13</sup> C <sub>10</sub> , <sup>15</sup> N <sub>2</sub> ]-5-formylcytosine          | quantifier | UniSpray+          | 146                            | [(M+7)-H] <sup>-</sup>              | 147                        | 102                     | 1.3               | 40          | 15                |
|                                                                                            | qualifier  | UniSpray+          | 146                            | [(M+7)-H] <sup>-</sup>              | 147                        | 73                      | 1.3               | 40          | 15                |
| 5-methyl-2'-deoxycytidine                                                                  | quantifier | UniSpray+          | 241                            | [M-H] <sup>-</sup>                  | 242                        | 126                     | 1.3               | 30          | 12                |
|                                                                                            | qualifier  | UniSpray+          | 241                            | [M-H] <sup>-</sup>                  | 242                        | 224                     | 1.3               | 30          | 12                |
| [ <sup>13</sup> C <sub>10</sub> , <sup>15</sup> N <sub>2</sub> ]-5-methyl-2'-deoxycytidine | quantifier | UniSpray+          | 253                            | [(M+12)-H] <sup>-</sup>             | 254                        | 133                     | 1.3               | 30          | 12                |
|                                                                                            | qualifier  | UniSpray+          | 241                            | [(M+12)-H] <sup>-</sup>             | 254                        | 236                     | 1.3               | 30          | 12                |

22

23
